# Supplementary material for: Adiposity and blood pressure among 55 000 relatively lean rural adults in southwest of China
Source: PubMed Central journal article supplement (PMC4537884; doi:10.1038/jhh.2014.129), 2015-02-05
Supplement: jhh2014129x2.pdf [file jhh2014129x2.pdf]

**eFigure 2. Increment of diastolic blood pressure (DBP) for each 5 kg/m<sup>2</sup> BMI increase in different subgroups (n = 53 578)\***

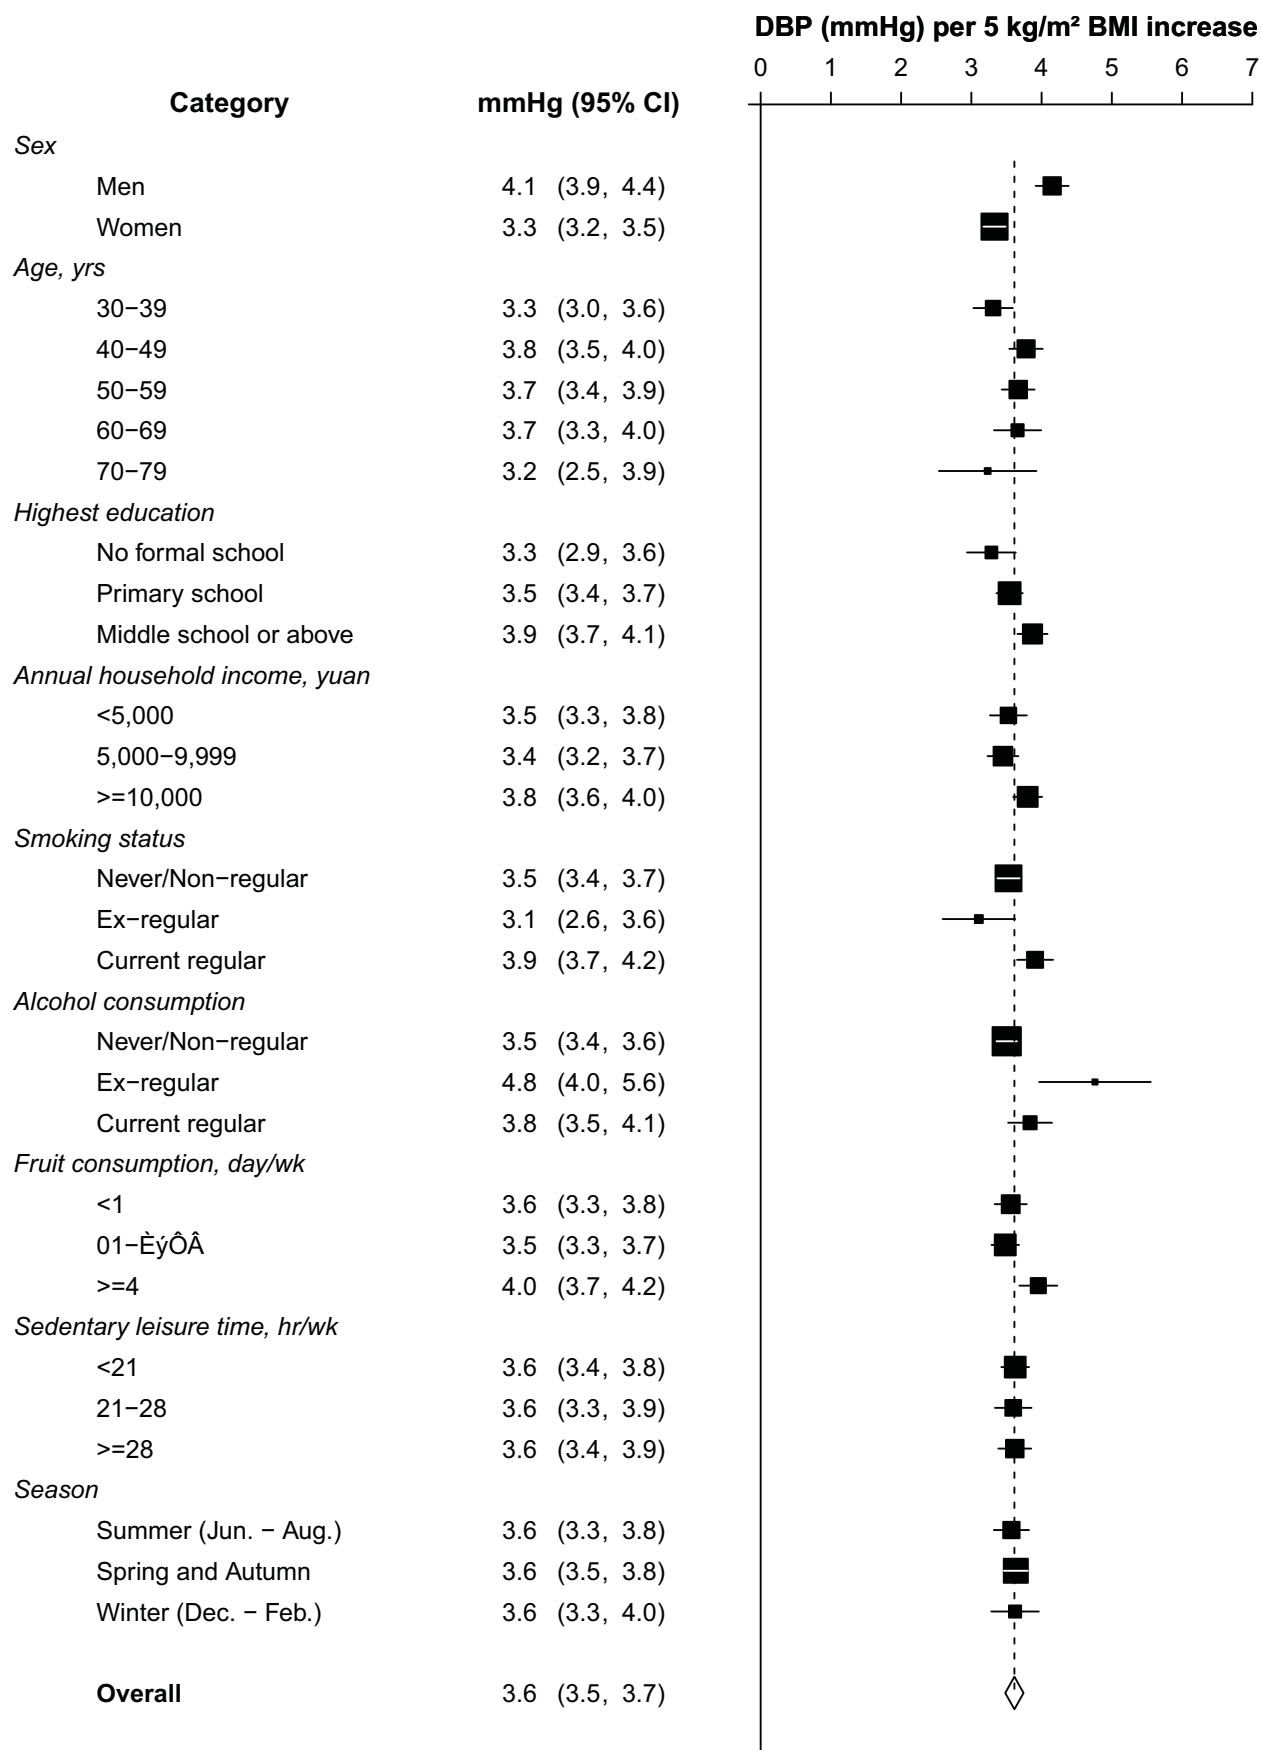

\*Where appropriate, adjustment was made for sex, age, education, annual household income, smoking, alcohol and fruit consumption, sedentary leisure time and season; 2109 participants under anti-hypertensive treatment were excluded from analyses
