# Supplementary material for: Adiposity and blood pressure among 55 000 relatively lean rural adults in southwest of China
Source: PubMed Central journal article supplement (PMC4537884; doi:10.1038/jhh.2014.129), 2015-02-05
Supplement: jhh2014129x5.pdf [file jhh2014129x5.pdf]

**eFigure 5. Systolic blood pressure (SBP) in relation to body mass index (BMI) and waist hip ratio (WHR) among 53 578 participants\***

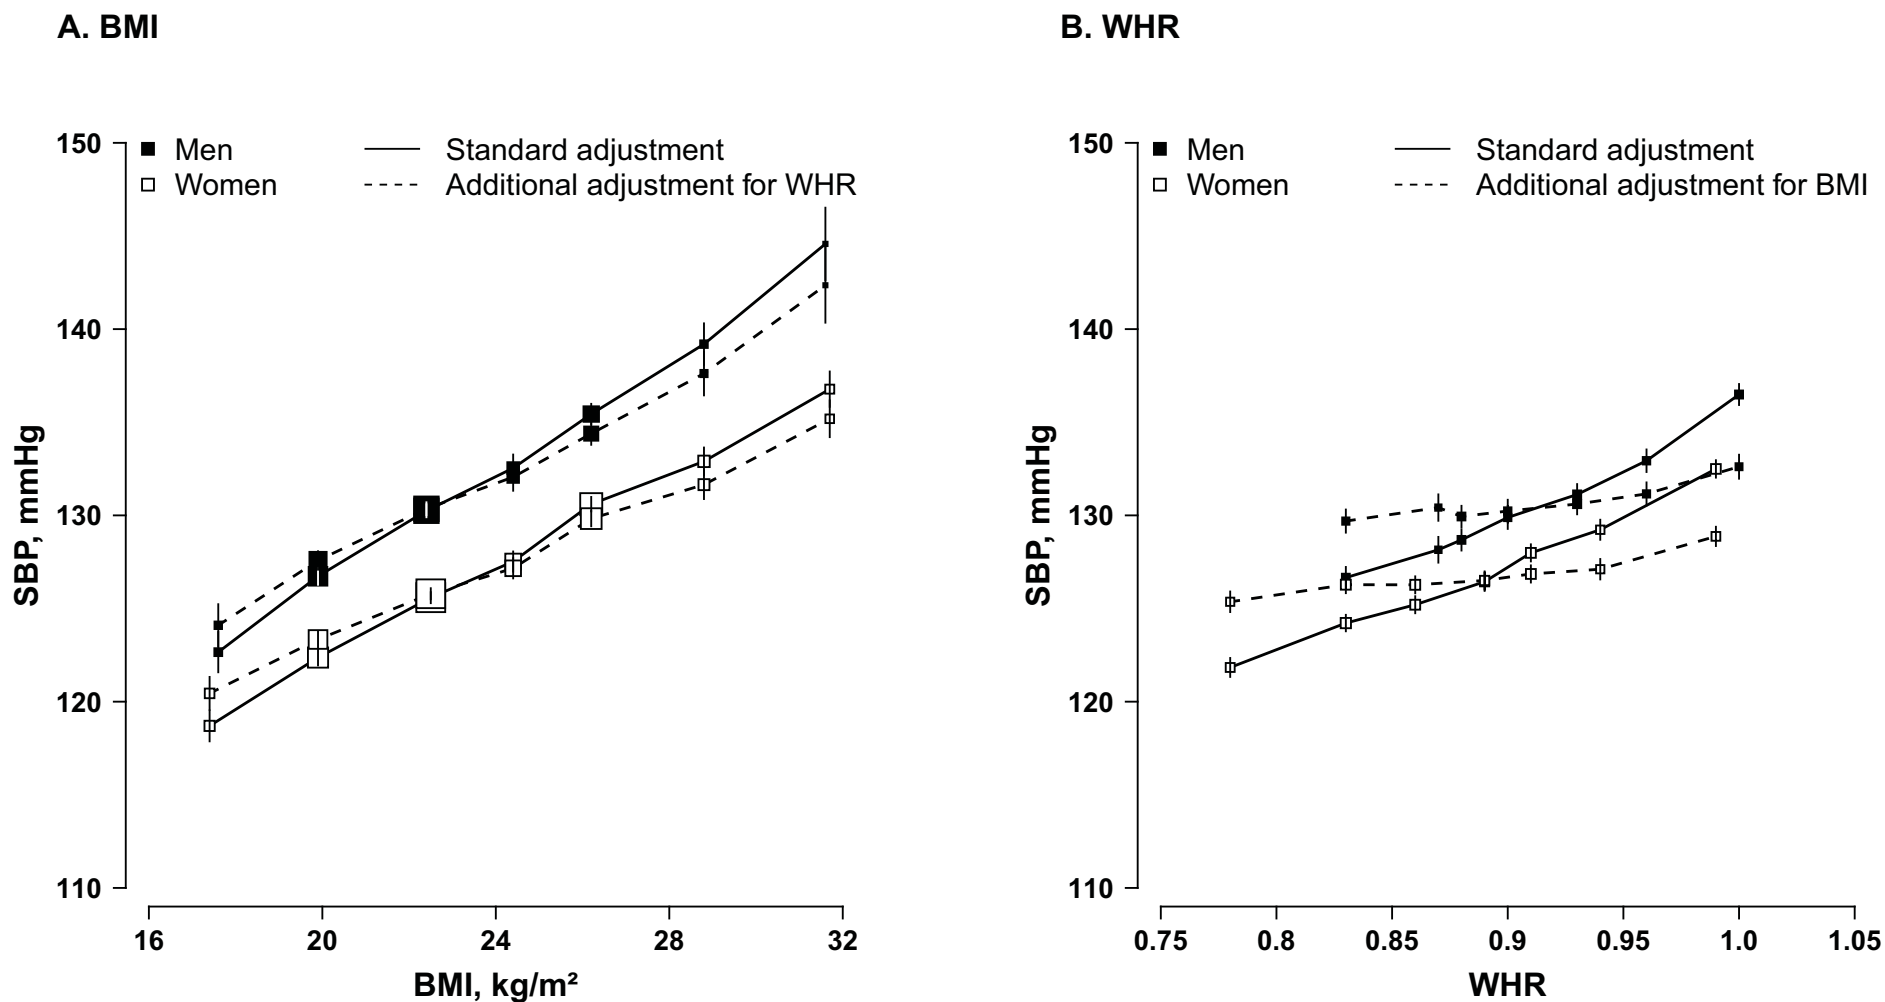

\*Adjustment was made for age, education, annual household income, smoking, alcohol and fruit consumption, sedentary leisure time, and season. 2109 participants under hypertensive treatment were excluded from analyses
